# Supplementary material for: Comprehensive overview of machine learning applications in MOFs: from modeling processes to latest applications and design classifications
Source: Royal Society of Chemistry journal article supplement (doi:10.1039/d4ta06740a), 2024-12-17
Supplement: d4ta06740a1.pdf [file d4ta06740a1.pdf]

# **Comprehensive Overview of Machine Learning Application in MOFs: From Modeling Processes to Latest Applications and Design Classifications**

Yutong Liu, Yawen Dong, Hua Wu\*

Department of Chemistry, College of Sciences, Nanjing Agricultural University,  
Nanjing 210095, P. R. China

\* corresponding authors

E-mail: wuhua@njau.edu.cn

13 pages

Contains 5 tables.

### **Contents**

Table S1. Summary of data sources.

Table S2. Summary of commonly used material databases.

Table S3. Summary of common material descriptors.

Table S4. Three mainstream Cross Validation (CV) methods.

Table S5. The application of MOFs combined with ML in the adsorption and separation of various gases.

References

**Table S1.** Summary of data sources.

| Sources     | Descriptions                                                                                                      | Advantages                                                                                                                            | Disadvantages                                                                                                                               | Future trend                                                           |
|-------------|-------------------------------------------------------------------------------------------------------------------|---------------------------------------------------------------------------------------------------------------------------------------|---------------------------------------------------------------------------------------------------------------------------------------------|------------------------------------------------------------------------|
| Experiment  | The scientific study of synthesizing specific MOFs by manually adjusting various experimental parameters.         | Because reliable data cannot be obtained, synthetic experiments under certain conditions cannot be replaced by computational methods. | Experiment is costly and time-consuming, and the sensitivity of MOFs to the synthesis conditions will lead to the deviation of the results. | High-throughput experimental (HTE) + Machine Learning (ML)             |
| Literature  | Searchable written information that has been published in a journal or book.                                      | A large amount of experimental information to be used is stored.                                                                      | Provided as text, manual extraction of information is time-consuming, laborious and error-prone.                                            | Natural Language Processing (NLP) and Large Language Models (LLM)      |
| Database    | A publicly available or paid collection of crystal structures data.                                               | A plenty of data and a variety of structural parameters are contained.                                                                | There are many sources, disordered relationships and poor universality.                                                                     | Standardize data format, enhance its universality and systematicness.  |
| Calculation | According to the existing data and combined with mathematics, physics and chemistry knowledge to expand the data. | Computational data sources are more readily available and apply to target attributes that lack sufficient data.                       | Some data are unreasonable and lack of experimental verification, which will interfere with the results of material development.            | High-Throughput Computational Screening (HTCS) + Machine Learning (ML) |

**Table S2.** Summary of commonly used material databases.

| Database                                             | Number         | Year | Descriptions                                                                                                                                                   | URL                                                                                                 |
|------------------------------------------------------|----------------|------|----------------------------------------------------------------------------------------------------------------------------------------------------------------|-----------------------------------------------------------------------------------------------------|
| Inorganic Crystal Structure Database (ICSD)          | over 240,000   | 1913 | The largest database in the world for totally identified inorganic crystal structures, provided by FIZ Karlsruhe GmbH. <sup>[1-3]</sup>                        | <a href="https://psds.ac.uk/icsd">https://psds.ac.uk/icsd</a>                                       |
| Cambridge Structure Database (CSD)                   | over 1,000,000 | 1965 | A database of over 1,000,000 small-molecule organic and organometallic crystal structures, including 69,666 MOFs. <sup>[4, 5]</sup>                            | <a href="https://psds.ac.uk/csd">https://psds.ac.uk/csd</a>                                         |
| Crystallography Open Database (COD)                  | 500,000        | 2003 | An available collection of crystal structures of organic, inorganic, metal-organic compounds and minerals, excluding biopolymers.                              | <a href="http://crystallography.net/cod/browse.html">http://crystallography.net/cod/browse.html</a> |
| Materials Project                                    | 154,718        | 2011 | A core program of the Materials Genome Initiative that reveals the properties of all known inorganic materials using high-throughput computing. <sup>[6]</sup> | <a href="https://next-gen.materialsproject.org/">https://next-gen.materialsproject.org/</a>         |
| Automatic Flow (AFLOW)                               | 3,530,330      | 2012 | A globally available database of 3,530,330 material compounds with over 734,308,640 calculated properties, and growing. <sup>[7]</sup>                         | <a href="http://www.aflowlib.org/">http://www.aflowlib.org/</a>                                     |
| Hypothetical MOFs Database (hMOFs)                   | 137,953        | 2012 | A crystal structure database for screening hypothetical MOFs by large-scale assembly of metal clusters and organic ligands. <sup>[8]</sup>                     | <a href="http://hmoFs.northwestern.edu">http://hmoFs.northwestern.edu</a>                           |
| Computation-Ready, Experimental MOFs Database (CoRE) | 5,109          | 2014 | A collection of MOF structures derived from experimental data which can be immediately applied to molecular simulation. <sup>[9]</sup>                         | <a href="https://zenodo.org/records/7691378">https://zenodo.org/records/7691378</a>                 |
| The Open Quantum                                     | 1,022,603      | 2015 | A part of an update to the CoRE MOF 2014 Database including over 14 000 porous, three-dimensional MOF structures. <sup>[10]</sup>                              | <a href="https://www.oqmd.org/">https://www.oqmd.org/</a>                                           |

---

|                                              |              |      |                                                                                                                                  |                                                                                                                                         |
|----------------------------------------------|--------------|------|----------------------------------------------------------------------------------------------------------------------------------|-----------------------------------------------------------------------------------------------------------------------------------------|
| Materials Database (OQMD)                    |              |      | more than 1 million materials, created in Chris Wolverton's group at Northwestern University. <sup>[11]</sup>                    |                                                                                                                                         |
| Material Genome Engineering Databases (MGED) | 710,050      | 2018 | A database / application software integrated system platform based on material genetic engineering.                              | <a href="https://www.mgedata.cn/">https://www.mgedata.cn/</a>                                                                           |
| Quantum MOF (QMOF)                           | 14,482       | 2021 | An online database of computed quantum-chemical properties for more than 14,000 experimentally synthesized MOFs. <sup>[12]</sup> | <a href="https://figshare.com/articles/dataset/QMOF_Database/13147324">https://figshare.com/articles/dataset/QMOF_Database/13147324</a> |
| MOFX-DB                                      | over 160,000 | 2023 | A publicly available Database of Computational Adsorption Data for Nanoporous Materials. <sup>[13]</sup>                         | <a href="https://mof.tech.northwestern.edu">https://mof.tech.northwestern.edu</a>                                                       |
| ARC-MOF                                      | over 280,000 | 2023 | A diverse database of MOFs with DFT-derived partial atomic charges and descriptors. <sup>[14]</sup>                              | <a href="https://doi.org/10.5281/zenodo.6908727">https://doi.org/10.5281/zenodo.6908727</a>                                             |

---

**Table S3.** Summary of common material descriptors.

| Categories             | Descriptors                                                                                                 |
|------------------------|-------------------------------------------------------------------------------------------------------------|
| Geometrical descriptor | Pore size, dominant pore size, maximum pore size                                                            |
|                        | Available pore volume ( $V_a$ )                                                                             |
|                        | Gravimetric surface                                                                                         |
|                        | Surface area (SA), Accessible surface area (ASA), volumetric surface area (VSA), gravity surface area (GSA) |
|                        | void fraction (VF)                                                                                          |
|                        | global cavity diameter (GCD)                                                                                |
|                        | largest cavity diameter (LCD)                                                                               |
|                        | pore limiting diameter (PLD)                                                                                |
|                        | pore size distribution (PSD)                                                                                |
|                        | pore volume (PV)                                                                                            |
|                        | density ( $\rho$ )                                                                                          |
|                        | pore connectivity                                                                                           |
|                        | pore morphology                                                                                             |
|                        | porosity                                                                                                    |
| Topological descriptor | cavity size                                                                                                 |
|                        | coordination numbers                                                                                        |
|                        | bond angles                                                                                                 |
|                        | atom-specific persistent homology (ASPH)                                                                    |
|                        | atomic type and number                                                                                      |
|                        | degree of unsaturation, total unsaturation                                                                  |
| Chemical descriptor    | electronegativity                                                                                           |
|                        | atomic composition                                                                                          |
|                        | electronic configurations                                                                                   |
|                        | metallic percentage                                                                                         |
|                        | oxygen to metal ratio (OMR)                                                                                 |
|                        | nitrogen to oxygen ratio (NOR)                                                                              |

---

|                   |                                                |
|-------------------|------------------------------------------------|
|                   | crystal structure                              |
|                   | electrostatic potential-derived charge (ESPC)  |
|                   | cohesive energies                              |
|                   | voronoi energies                               |
|                   | electronic band structure                      |
|                   | density of states                              |
|                   | heat of adsorption ( $\Delta_{\text{ads}}H$ )  |
| Energy descriptor | working capacity ( $\Delta W$ )                |
|                   | energy efficiency                              |
|                   | isosteric heat ( $Q_{\text{st}}$ )             |
|                   | Henry coefficient ( $K_{\text{H}}$ )           |
|                   | effective point charge (EPoCh) <sup>[15]</sup> |
|                   | potential energy surface (PES)                 |

---

**Table S4.** Three mainstream Cross Validation (CV) methods.

| CV Type     | Application situation                                                                                                    | Advantages                                                                                                                                                      | Disadvantages                                                                                                                                                                                                                |
|-------------|--------------------------------------------------------------------------------------------------------------------------|-----------------------------------------------------------------------------------------------------------------------------------------------------------------|------------------------------------------------------------------------------------------------------------------------------------------------------------------------------------------------------------------------------|
| Hold-out CV | It is common in early tasks such as decision tree, naive Bayesian classifier, linear regression and logistic regression. | The dataset partition is simple and easy to operate.                                                                                                            | Only part of the data is used in the model training, and the dataset is divided only once. So the result is accidental. <sup>[16]</sup>                                                                                      |
| LOOCV       | It is suitable for small sample datasets.                                                                                | All data points are utilized, so the bias is low.                                                                                                               | Training is more complex and time-consuming. <sup>[17]</sup> And the validity of the test model changes greatly. Because testing for one data point, the estimated value of the model is greatly affected by the data point. |
| K-CV        | It is suitable for large sample datasets.                                                                                | The use of data is more efficient after multiple divisions, and the contingency of the results is greatly reduced, thereby improving the accuracy of the model. | Random and equal division of data is not suitable for datasets containing different categories.                                                                                                                              |



**Table S5.** The application of MOFs combined with ML in the adsorption and separation of various gases.

| Gas type                                             | ML Algorithms                                                                                                                     | References |
|------------------------------------------------------|-----------------------------------------------------------------------------------------------------------------------------------|------------|
|                                                      | Decision Tree (DT), Random Forest (RF), Support Vector                                                                            |            |
| Methane (CH <sub>4</sub> )                           | Machine (SVM), Poisson regression, Neural Network (NN), Unsupervised Transfer learning (TL), etc.                                 | [18-27]    |
| Carbon Dioxide (CO <sub>2</sub> )                    | SVM, DT, RF, NN, Gradient Boosting Machines (GBM) Multiple Linear Regression (MLR), etc.                                          | [28-36]    |
| CO <sub>2</sub> / CH <sub>4</sub>                    | DT, SVM.                                                                                                                          | [37]       |
| Hydrogen (H <sub>2</sub> )                           | DT, RF, Support Vector Regression (SVR), Linear Regression (LR), K-NearesNeighbor (KNN), Gradient Boosting Regression (GBR), etc. | [38-40]    |
| CO <sub>2</sub> / H <sub>2</sub>                     | Gradient Boosted Regression Tree (GBRT)                                                                                           | [41]       |
| Nitrogen (N <sub>2</sub> )                           | K-means clustering                                                                                                                | [42]       |
| O <sub>2</sub> / N <sub>2</sub>                      | RF, GBRT, and Extreme Gradient Boosting (XGB).                                                                                    | [43]       |
| Xenon / Krypton (Xe / Kr)                            | MOF-NET and Multi-Species Genetic Algorithm (MSGA) <sup>[44]</sup>                                                                | [45]       |
| Ethane / Ethylene                                    | RF, LR, DT, SVM, kNN, GBM, etc.                                                                                                   | [46-48]    |
| Propane / Propylene                                  | RF, DT, etc.                                                                                                                      | [49-52]    |
| Isobutene / Isobutane                                | LASSO, Elastic Net, SVM, XGBoost, Ridge Regression (RR), Bayes Regression (BR), and Artificial Neural Network (ANN).              | [53]       |
| Acetylene                                            | DT, SVM, Gradient Boosting Decision Tree (GBDT), and Back Propagation Neural Network (BPNN).                                      | [54]       |
| High-sour natural gas                                | BPNN and the Partial Least-Square (PLS)                                                                                           | [55]       |
| H <sub>2</sub> S / CO <sub>2</sub> / CH <sub>4</sub> | XGB, GBRT, Multi-layer perceptron (MLP), and the model obtained from the Tree-based Pipeline Optimisation Tool (TPOT).            | [56]       |

## References

- [1] D. Zagorac, H. Mueller, S. Ruehl, J. Zagorac, S. Rehme, *J. Appl. Crystallogr.* **2019**, *52*, 918.
- [2] G. Bergerhoff, R. Hundt, R. Sievers, I. D. Brown, *J. Chem. Inf. Comput. Sci.* **1983**, *23*, 66.
- [3] A. Belsky, M. Hellenbrandt, V. L. Karen, P. Luksch, *Acta Crystallogr B* **2002**, *58*, 364.
- [4] P. Z. Moghadam, A. Li, S. B. Wiggin, A. Tao, A. G. P. Maloney, P. A. Wood, S. C. Ward, D. Fairen-Jimenez, *Chem. Mater.* **2017**, *29*, 2618.
- [5] C. R. Groom, F. H. Allen, *Angew Chem Int Edit* **2014**, *53*, 662.
- [6] A. Jain, O. Shyue Ping, G. Hautier, W. Chen, W. D. Richards, S. Dacek, S. Cholia, D. Gunter, D. Skinner, G. Ceder, K. A. Persson, *Apl Mater.* **2013**, *1*, 011002.
- [7] S. Curtarolo, W. Setyawan, S. Wang, J. Xue, K. Yang, R. H. Taylor, L. J. Nelson, G. L. W. Hart, S. Sanvito, M. Buongiorno-Nardelli, N. Mingo, O. Levy, *Comput. Mater. Sci.* **2012**, *58*, 227.
- [8] C. E. Wilmer, M. Leaf, C. Y. Lee, O. K. Farha, B. G. Hauser, J. T. Hupp, R. Q. Snurr, *Nat. Chem.* **2012**, *4*, 83.
- [9] Y. G. Chung, J. Camp, M. Haranczyk, B. J. Sikora, W. Bury, V. Krungleviciute, T. Yildirim, O. K. Farha, D. S. Sholl, R. Q. Snurr, *Chem. Mater.* **2014**, *26*, 6185.
- [10] Y. G. Chung, E. Haldoupis, B. J. Bucior, M. Haranczyk, S. Lee, H. Zhang, K. D. Vogiatzis, M. Milisavljevic, S. Ling, J. S. Camp, B. Slater, J. I. Siepmann, D. S. Sholl, R. Q. Snurr, *J. Chem. Eng. Data* **2019**, *64*, 5985.
- [11] S. Kirklin, J. E. Saal, B. Meredig, A. Thompson, J. W. Doak, M. Aykol, S. Ruehl, C. Wolverton, *npj Comput. Mater.* **2015**, *1*, 15010.
- [12] A. S. Rosen, S. M. Iyer, D. Ray, Z. Yao, A. Aspuru-Guzik, L. Gagliardi, J. M. Notestein, R.

- Q. Snurr, *Matter* **2021**, *4*, 1578.
- [13] N. S. Bobbitt, K. Shi, B. J. Bucior, H. Chen, N. Tracy-Amoroso, Z. Li, Y. Sun, J. H. Merlin, J. I. Siepmann, D. W. Siderius, R. Q. Snurr, *J. Chem. Eng. Data* **2023**, *68*, 483.
- [14] J. Burner, J. Luo, A. White, A. Mirmiran, O. Kwon, P. G. Boyd, S. Maley, M. Gibaldi, S. Simrod, V. Ogden, T. K. Woo, *Chem. Mater.* **2023**, *35*, 900.
- [15] I. B. Orhan, T. C. Le, R. Babarao, A. W. Thornton, *Commun. Chem.* **2023**, *6*, 214.
- [16] Q. Li, *Int. J. Comput. Ass. Rad.* **2006**, *1*, 347.
- [17] J. Zhang, S. Wang, *Neural Comput. Appl.* **2016**, *27*, 1717.
- [18] R. Wang, Y. Zhong, L. Bi, M. Yang, D. Xu, *Acs Appl. Mater. Interfaces* **2020**, *12*, 52797.
- [19] R. Gurnani, Z. Yu, C. Kim, D. S. Sholl, R. Ramprasad, *Chem. Mater.* **2021**, *33*, 3543.
- [20] X. Wei, Z. Lu, Y. Ai, L. Shen, M. Wei, X. Wang, *Sep. Purif. Technol.* **2024**, *330*, 125291.
- [21] X. Wu, Z. Cao, X. Lu, W. Cai, *Chem. Eng. J.* **2023**, *459*, 141612.
- [22] R. Wang, Y. Zou, C. Zhang, X. Wang, M. Yang, D. Xu, *Microporous Mesoporous Mater.* **2022**, *331*, 111666.
- [23] M. Suyetin, *Faraday Discuss.* **2021**, *231*, 224.
- [24] S. Y. Kim, S. I. Kim, Y. S. Bae, *J. Phys. Chem. C* **2020**, *124*, 19538.
- [25] Z. Gulsoy, K. B. Sezginel, A. Uzun, S. Keskin, R. Yildirim, *Acs Comb. Sci.* **2019**, *21*, 257.
- [26] G. S. Fanourgakis, K. Gkagkas, E. Tylianakis, E. Klontzas, G. Froudakis, *J. Phys. Chem. A* **2019**, *123*, 6080.
- [27] M. Pardakhti, E. Moharrerri, D. Wanik, S. L. Suib, R. Srivastava, *Acs Comb. Sci.* **2017**, *19*, 640.

- [28] B. Zheng, F. L. Oliveira, R. N. B. Ferreira, M. Steiner, H. Hamann, G. X. Gu, B. Luan, *Acs Nano* **2023**, *17*, 5579.
- [29] S. Kancharlapalli, R. Q. Snurr, *Acs Appl. Mater. Interfaces* **2023**, *15*, 28084.
- [30] Z. Zhang, X. Cao, C. Geng, Y. Sun, Y. He, Z. Qiao, C. Zhong, *J. Membr. Sci.* **2022**, *650*, 120399.
- [31] Z. Sun, Y. Liao, S. Zhao, X. Zhang, Q. Liu, X. Shi, *J. Mater. Chem. A* **2022**, *10*, 5174.
- [32] K. Choudhary, T. Yildirim, D. W. Siderius, A. G. Kusne, A. Mcdannald, D. L. Ortiz-Montalvo, *Comput. Mater. Sci.* **2022**, *210*, 111388.
- [33] M. N. Amar, H. Ouaer, M. A. Ghriga, *Fuel* **2022**, *311*, 122545.
- [34] X. Deng, W. Yang, S. Li, H. Liang, Z. Shi, Z. Qiao, *Appl. Sci.-Basel* **2020**, *10*, 569.
- [35] T. D. Burns, K. N. Pai, S. G. Subraveti, S. P. Collins, M. Krykunov, A. Rajendran, T. K. Woo, *Environ. Sci. Technol.* **2020**, *54*, 4536.
- [36] R. Anderson, J. Rodgers, E. Argueta, A. Biong, D. A. Gomez-Gualdrón, *Chem. Mater.* **2018**, *30*, 6325.
- [37] M. Z. Aghaji, M. Fernandez, P. G. Boyd, T. D. Daff, T. K. Woo, *Eur. J. Inorg. Chem.* **2016**, 4505.
- [38] J. Park, Y. Lim, S. Lee, J. Kim, *Chem. Mater.* **2023**, *35*, 9.
- [39] K. Salehi, M. Rahmani, S. Atashrouz, *Int. J. Hydrogen Energy* **2023**, *48*, 33260.
- [40] X. Zhang, Q. R. Zheng, H. Z. He, *J. Taiwan Inst. Chem. Eng.* **2022**, *138*, 104479.
- [41] H. Dureckova, M. Krykunov, M. Z. Aghaji, T. K. Woo, *J. Phys. Chem. C* **2019**, *123*, 4133.
- [42] M. Fernandez, A. S. Barnard, *Acs Comb. Sci.* **2016**, *18*, 243.

- [43] Y. Yan, Z. Shi, H. Li, L. Li, X. Yang, S. Li, H. Liang, Z. Qiao, *Chem. Eng. J.* **2022**, *427*, 131604.
- [44] S. Lee, B. Kim, H. Cho, H. Lee, S. Y. Lee, E. S. Cho, J. Kim, *Acs Appl. Mater. Interfaces* **2021**, *13*, 23647.
- [45] Y. Lim, J. Park, S. Lee, J. Kim, *J. Mater. Chem. A* **2021**, *9*, 21175.
- [46] P. Halder, J. K. Singh, *Energy Fuels* **2020**, *34*, 14591.
- [47] Z. Wang, T. Zhou, K. Sundmacher, *Chem. Eng. J.* **2022**, *444*, 136651.
- [48] Y. Wu, H. Duan, H. Xi, *Chem. Mater.* **2020**, *32*, 2986.
- [49] V. Daoo, J. K. Singh, *Acs Appl. Mater. Interfaces* **2024**, *16*, 6971.
- [50] H. Tang, Q. Xu, M. Wang, J. Jiang, *Acs Appl. Mater. Interfaces* **2021**, *13*, 53454.
- [51] Y. Wang, Z.-J. Jiang, D.-R. Wang, W. Lu, D. Li, *J. Am. Chem. Soc.* **2024**, *146*, 6955.
- [52] X. Xue, M. Cheng, S. Wang, S. Chen, L. Zhou, C. Liu, X. Ji, *Ind. Eng. Chem. Res.* **2023**, *62*, 1073.
- [53] X. Sun, W. Lin, K. Jiang, H. Liang, G. Chen, *Phys. Chem. Chem. Phys.* **2023**, *25*, 8608.
- [54] P. Yang, G. Lu, Q. Yang, L. Liu, X. Lai, D. Yu, *Green Energy Environ.* **2022**, *7*, 1062.
- [55] H. Liang, W. Yang, F. Peng, Z. Liu, J. Liu, Z. Qiao, *Apl Mater.* **2019**, *7*, 091101.
- [56] W. Gao, W. Zheng, K. Yan, W. Sun, L. Zhao, *Fuel* **2023**, *350*, 128757.
